# Supplementary material for: Meta-analysis of genome-wide association studies of gestational duration and spontaneous preterm birth identifies new maternal risk loci
Source: PubMed Central journal article supplement (PMC10621942; doi:10.1371/journal.pgen.1010982), 2023-10-23
Supplement: pgen.1010982.s004.pdf [file pgen.1010982.s004.pdf]

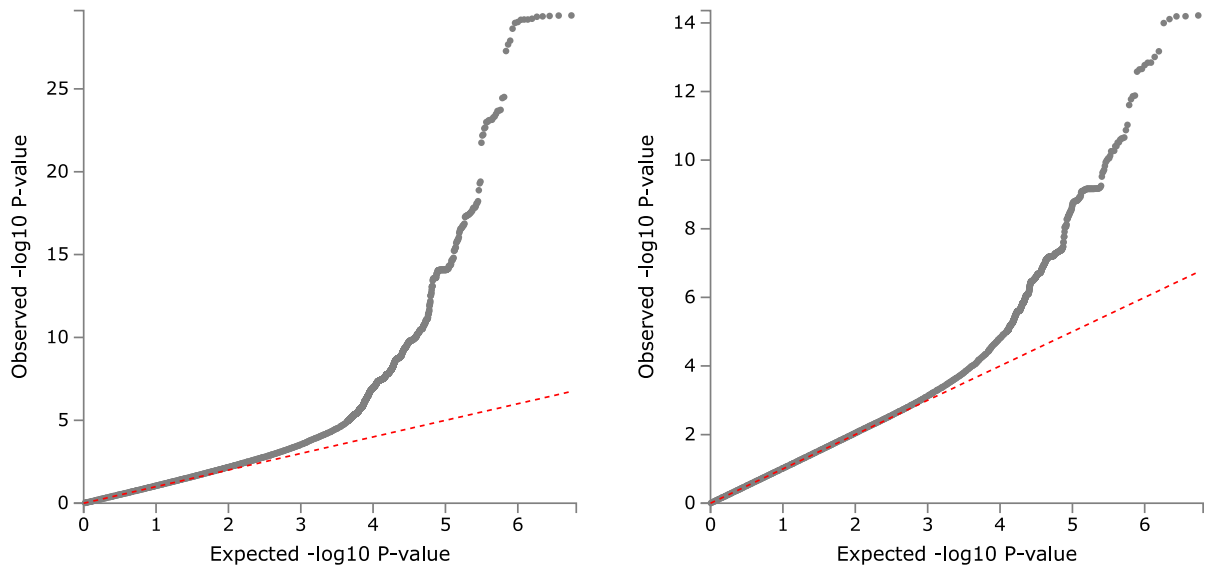

**S4 Fig. QQ-plots of the meta-analysis of gestational duration (on the left) and SPTB (on the right).**
