# Supplementary material for: Meta-analysis of genome-wide association studies of gestational duration and spontaneous preterm birth identifies new maternal risk loci
Source: PubMed Central journal article supplement (PMC10621942; doi:10.1371/journal.pgen.1010982), 2023-10-23
Supplement: pgen.1010982.s005.pdf [file pgen.1010982.s005.pdf]

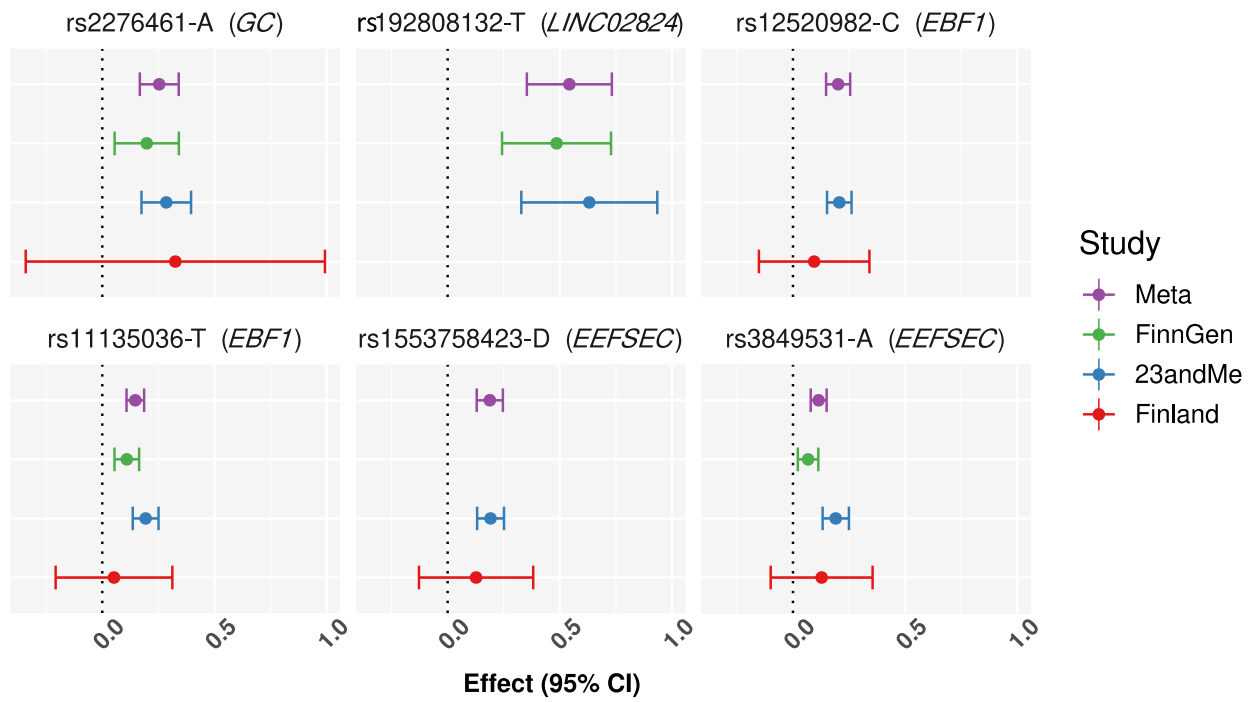

**S5 Fig. Effect estimates of the genome-wide significant loci from the meta-analysis populations of SPTB.** Two variants in *EBF1* and *EEFSEC* loci are shown because the meta-analysis lead variants were not present in the FinnGen-based GWAS.
