# Supplementary material for: Meta-analysis of genome-wide association studies of gestational duration and spontaneous preterm birth identifies new maternal risk loci
Source: PubMed Central journal article supplement (PMC10621942; doi:10.1371/journal.pgen.1010982), 2023-10-23
Supplement: pgen.1010982.s009.pdf [file pgen.1010982.s009.pdf]

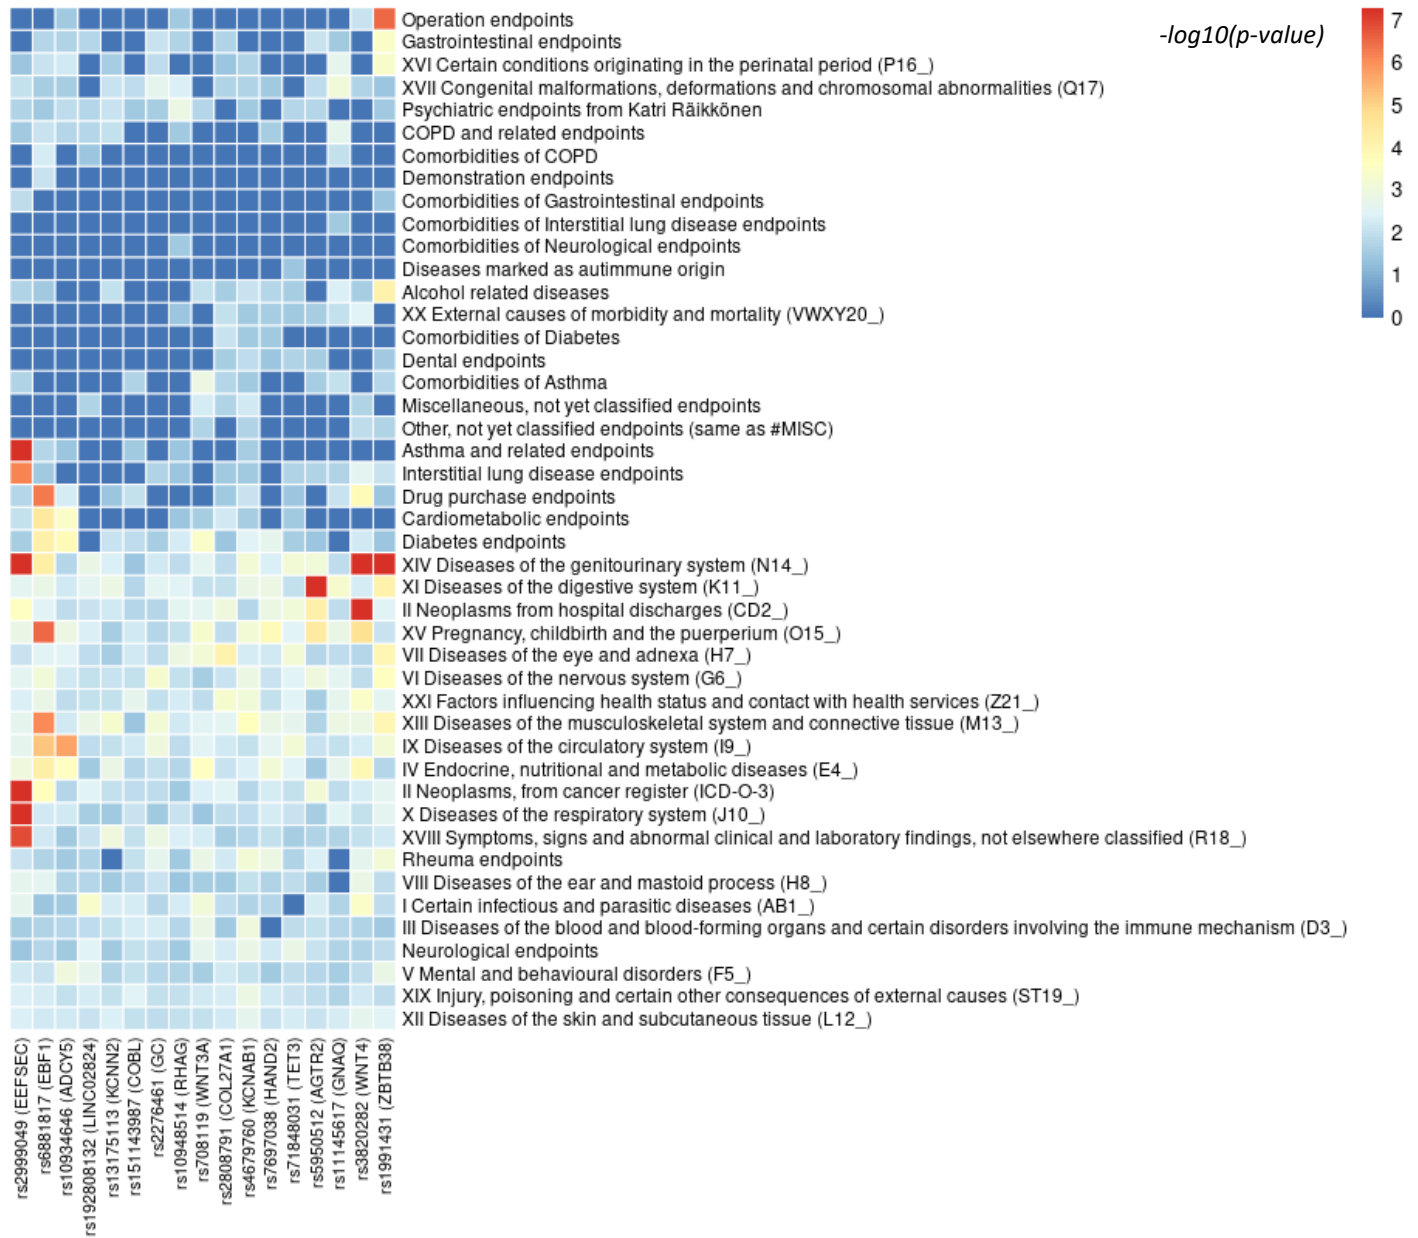

**S9 Fig. Associations of the candidate genes from the meta-analysis of SPTB and gestational duration in the FinnGen R7 GWAS endpoint categories, each comprising >3,000 traits. In each category,  $p$  value is based on the strongest associating trait.**
