# Supplementary material for: Meta-analysis of genome-wide association studies of gestational duration and spontaneous preterm birth identifies new maternal risk loci
Source: PubMed Central journal article supplement (PMC10621942; doi:10.1371/journal.pgen.1010982), 2023-10-23
Supplement: pgen.1010982.s010.pdf [file pgen.1010982.s010.pdf]

S1 Table. Properties of the phenotype and genotype data and data handling of the meta-analysis cohorts.

|                                 | Phenotype data |                                                                                                                                                                                                                                                                                                                                                                            |                                                                                                                                                                                                                                                      | Genotype data                                                                                                                                                                                                                                                         |                                                                          |                                                                                                                 |                                                                     |                                               |
|---------------------------------|----------------|----------------------------------------------------------------------------------------------------------------------------------------------------------------------------------------------------------------------------------------------------------------------------------------------------------------------------------------------------------------------------|------------------------------------------------------------------------------------------------------------------------------------------------------------------------------------------------------------------------------------------------------|-----------------------------------------------------------------------------------------------------------------------------------------------------------------------------------------------------------------------------------------------------------------------|--------------------------------------------------------------------------|-----------------------------------------------------------------------------------------------------------------|---------------------------------------------------------------------|-----------------------------------------------|
|                                 | Source         | Definition of preterm birth                                                                                                                                                                                                                                                                                                                                                | Exclusion criteria                                                                                                                                                                                                                                   | Quality control prior to GWAS                                                                                                                                                                                                                                         | Data transformation                                                      | GWAS Method                                                                                                     | GWAS covariates                                                     | Quality control after GWAS                    |
| <b>FinnGenR6</b>                | Register-based | Based on ICD-codes and gestational duration. ICD8, 63497 (Partus praematurus imminens, alibi non classificabilis, at 29-37 weeks of gestation); ICD9, 644A (partus praematurus/imminens), individuals with term births (>37wk) excluded; ICD9, 644B (partus praematurus, at 29-37 weeks of gestation); ICD10, O60 (preterm birth, delivery started <37 weeks of gestation) | Multiple gestation or birth, pre- or eclampsia, polyhydroamnios                                                                                                                                                                                      | Sample exclusion criteria: ambiguous sex, non-Finnish ancestry, missingness >5%, excess heterozygosity ( $\chi^2/4SD$ ); Variant exclusion criteria: missingness >2%, minor allele count (MAC)<3, deviation from HWE ( $p < 1 \times 10^{-8}$ ), imputation INFO <0.7 | Gestational duration were inverse-normalized                             | Linear / logistic regression with Scalable and Accurate Implementation of Generalized mixed model, SAIGE, MAC=5 | Maternal age, genotyping batch, the 10 leading principal components | Variant exclusions: MAF<0.01%                 |
| <b>Northern/Central Finland</b> | Register-based | Based on gestational duration: Preterm, <36 wk + 1d of gestation; term > 38-41 wk + 6 d of gestation                                                                                                                                                                                                                                                                       | Multiple gestation or birth, pre- or eclampsia, polyhydroamnios, intrauterine growth restriction, placental abruption, anomalies of the fetus, clinical chorioamnionitis or acute septic infection in the mother, alcohol or narcotic use, accidents | Sample exclusion criteria: high missingness (>10%), uncertain sex; Variant exclusion criteria: minor allele frequency (MAF)<1%, deviation from HWE ( $p < 1 \times 10^{-8}$ ), genotyping rate <90%, imputation INFO <0.7                                             | Gestational duration were mean centered, scaled, and quantile normalized | Frequentist association test / quantitative trait test with SNPTTESTV2                                          | The top three MDS (multidimensional scaling) components             | Variant exclusions: MAF<1%, SNPTTEST info<0.7 |
| <b>23andMe</b>                  | Self-reported  | Based on gestational duration: Preterm, <37 wk of gestation; term >37wk of gestation                                                                                                                                                                                                                                                                                       | Medical indication for preterm delivery                                                                                                                                                                                                              | Sample exclusion criteria: <97% of European ancestry; Variant exclusion criteria: deviation from HWE ( $p < 1 \times 10^{-8}$ ), call rate <95%, allele frequency discrepancy with 1000Genomes Europeans                                                              | None                                                                     | Linear / logistic regression                                                                                    | Maternal age and the top five principal components                  | Variant exclusions: MAF<0.01%                 |
