# Supplementary material for: Meta-analysis of genome-wide association studies of gestational duration and spontaneous preterm birth identifies new maternal risk loci
Source: PubMed Central journal article supplement (PMC10621942; doi:10.1371/journal.pgen.1010982), 2023-10-23
Supplement: pgen.1010982.s013.pdf [file pgen.1010982.s013.pdf]

**S4 Table. LDSC based SNP heritability of gestational duration and SPTB in the FinnGen GWAS and in the meta-analysis.**

| <b>Gestational duration</b> |                  |               |                |                          |                           |
|-----------------------------|------------------|---------------|----------------|--------------------------|---------------------------|
| <b>population</b>           | <b>N_preterm</b> | <b>N_term</b> | <b>N_total</b> | <b>sample_prevalence</b> | <b>H<sup>2</sup> (se)</b> |
| FinnGenR6*                  | 2250             | 22141         | 24391          | 0,09224714               | <b>0.1263 (0.0593)</b>    |
| Finland                     | 286              | 488           | 774            | 0,369509044              |                           |
| 23andMe                     | 3331             | 40237         | 43568          | 0,076455196              |                           |
| Meta-analysis               | 5867             | 62866         | 68733          | 0,085359289              | <b>0.1747 (0.0266)</b>    |

  

| <b>SPTB Case-Control</b> |                  |               |                |                          |                           |
|--------------------------|------------------|---------------|----------------|--------------------------|---------------------------|
| <b>population</b>        | <b>N_preterm</b> | <b>N_term</b> | <b>N_total</b> | <b>sample_prevalence</b> | <b>H<sup>2</sup> (se)</b> |
| FinnGenR6*               | 4925             | 49105         | 54030          | 0,091153063              | <b>0.0181 (0.0248)</b>    |
| Finland                  | 286              | 488           | 774            | 0,369509044              |                           |
| 23andMe                  | 3331             | 40236         | 43567          | 0,076456951              |                           |
| Meta-analysis            | 8542             | 89829         | 98371          | 0,086834535              | <b>0.0565 (0.0141)</b>    |
