# Supplementary material for: Meta-analysis of genome-wide association studies of gestational duration and spontaneous preterm birth identifies new maternal risk loci
Source: PubMed Central journal article supplement (PMC10621942; doi:10.1371/journal.pgen.1010982), 2023-10-23
Supplement: pgen.1010982.s015.pdf [file pgen.1010982.s015.pdf]

**S6 Table. MAGMA gene set enrichment analysis.** Gene sets with adjusted  $p < 0.05$  or top 10 gene sets shown.**1) Gestational duration**

| Gene Set                                                                 | N genes | Beta   | Beta STD | SE      | P          | Pbon     |
|--------------------------------------------------------------------------|---------|--------|----------|---------|------------|----------|
| GO_bp:go_regulation_of_male_gonad_development                            | 8       | 1.6697 | 0.033679 | 0.32374 | 1.2642e-07 | 0.001958 |
| GO_bp:go_negative_regulation_of_gonad_development                        | 6       | 1.7937 | 0.031335 | 0.35575 | 2.3236e-07 | 0.003599 |
| GO_bp:go_regulation_of_steroid_hormone_biosynthetic_process              | 10      | 1.2403 | 0.027969 | 0.25691 | 6.9596e-07 | 0.010778 |
| GO_bp:go_kidney_mesenchyme_development                                   | 19      | 0.8523 | 0.026487 | 0.19948 | 9.6990e-06 | 0.150189 |
| Curated_gene_sets:naba_basement_membranes                                | 40      | 0.6294 | 0.028362 | 0.15166 | 1.6717e-05 | 0.258846 |
| GO_bp:go_mesenchymal_cell_differentiation_involved_in_kidney_development | 8       | 1.1576 | 0.023350 | 0.28038 | 1.8309e-05 | 0.283478 |
| GO_bp:go_regulation_of_glucocorticoid_biosynthetic_process               | 7       | 1.2095 | 0.022821 | 0.29547 | 2.1344e-05 | 0.330448 |
| GO_bp:go_primary_alcohol_biosynthetic_process                            | 11      | 0.9794 | 0.023162 | 0.25015 | 4.5343e-05 | 0.701955 |
| GO_bp:go_negative_regulation_of_ion_transport                            | 141     | 0.2822 | 0.023813 | 0.07226 | 4.7241e-05 | 0.731291 |
| GO_bp:go_regulation_of_aldosterone_metabolic_process                     | 7       | 1.2520 | 0.023623 | 0.32220 | 5.1185e-05 | 0.792293 |

**2) SPTB**

|                                                                     |      |        |          |         |            |   |
|---------------------------------------------------------------------|------|--------|----------|---------|------------|---|
| GO_cc:go_kinetochores_microtubule                                   | 7    | 0.9345 | 0.017629 | 0.26517 | 0.00021371 | 1 |
| GO_bp:go_neuron_differentiation                                     | 1329 | 0.0843 | 0.021160 | 0.02393 | 0.00021529 | 1 |
| GO_bp:go_regulation_of_delayed_rectifier_potassium_channel_activity | 18   | 0.7170 | 0.021688 | 0.20799 | 0.00028397 | 1 |
| Curated_gene_sets:hoshida_liver_cancer_subclass_s1                  | 236  | 0.1804 | 0.019653 | 0.05262 | 0.00030361 | 1 |
| GO_bp:go_actin_polymerization_dependent_cell_motility               | 6    | 1.2503 | 0.021843 | 0.36631 | 0.00032184 | 1 |
| GO_bp:go_neurogenesis                                               | 1573 | 0.0747 | 0.020276 | 0.02203 | 0.00034715 | 1 |
| Curated_gene_sets:berenjano_transformed_by_rhoa_reversibly_dn       | 30   | 0.5587 | 0.021814 | 0.16765 | 0.00043084 | 1 |
| GO_bp:go_cell_cell_adhesion_via_plasma_membrane_adhesion_molecules  | 268  | 0.1985 | 0.023024 | 0.05994 | 0.00046403 | 1 |
| GO_bp:go_g_protein_coupled_purinergic_receptor_signaling_pathway    | 22   | 0.6551 | 0.021907 | 0.19785 | 0.00046538 | 1 |
| Curated_gene_sets:mohankumar_hoxa1_targets_dn                       | 161  | 0.2111 | 0.019030 | 0.06392 | 0.00047957 | 1 |
